# Supplementary material for: Regulatory Noncoding Small RNAs Are Diverse and Abundant in an Extremophilic Microbial Community
Source: PubMed Central journal article supplement (PMC7002113; doi:10.1128/msystems.00584-19), 2020-02-04
Supplement: mSystems.00584-19-st001.pdf [file mSystems.00584-19-st001.pdf]

**Table S1: Samples collected and sequenced libraries**

| Sample      | Sequencing libraries |                     | Latitude       | Longitude       | Elevation | Collection date | Collection time |
|-------------|----------------------|---------------------|----------------|-----------------|-----------|-----------------|-----------------|
|             | Forward read file    | Reverse read file   |                |                 |           |                 |                 |
| s1a1        | s1a1_1.fastq         | s1a1_2.fastq        | 20°57'12.006"S | 70°11'10.5996"W | 680m      | 8-Feb-16        | 1:00            |
| s1a2        | s1a2_1.fastq         | s1a2_2.fastq        | 20°57'12.006"S | 70°11'10.5996"W | 680m      | 8-Feb-16        | 1:00            |
| s1a3        | s1a3_1.fastq         | s1a3_2.fastq        | 20°57'12.006"S | 70°11'10.5996"W | 680m      | 8-Feb-16        | 1:00            |
| s1b1        | s1b1_1.fastq         | s1b1_2.fastq        | 20°57'12.006"S | 70°11'10.5996"W | 680m      | 9-Feb-16        | 1:00            |
| s1b2        | s1b2_1.fastq         | s1b2_2.fastq        | 20°57'12.006"S | 70°11'10.5996"W | 680m      | 9-Feb-16        | 1:00            |
| s1b3        | s1b3_1.fastq         | s1b3_2.fastq        | 20°57'12.006"S | 70°11'10.5996"W | 680m      | 9-Feb-16        | 1:00            |
| s9b1        | s9b1_1.fastq         | s9b1_2.fastq        | 20°57'12.006"S | 70°11'10.5996"W | 680m      | 9-Feb-16        | 9:00            |
| s9b2        | s9b2_1.fastq         | s9b2_2.fastq        | 20°57'12.006"S | 70°11'10.5996"W | 680m      | 9-Feb-16        | 9:00            |
| s9b3        | s9b3_1.fastq         | s9b3_2.fastq        | 20°57'12.006"S | 70°11'10.5996"W | 680m      | 9-Feb-16        | 9:00            |
| s13a1       | s13a1_1.fastq        | s13a1_2.fastq       | 20°57'12.006"S | 70°11'10.5996"W | 680m      | 8-Feb-16        | 13:00           |
| s13a2       | s13a2_1.fastq        | s13a2_2.fastq       | 20°57'12.006"S | 70°11'10.5996"W | 680m      | 8-Feb-16        | 13:00           |
| s13a3       | s13a3_1.fastq        | s13a3_2.fastq       | 20°57'12.006"S | 70°11'10.5996"W | 680m      | 8-Feb-16        | 13:00           |
| s13b1       | s13b1_1.fastq        | s13b1_2.fastq       | 20°57'12.006"S | 70°11'10.5996"W | 680m      | 9-Feb-16        | 13:00           |
| s13b2       | s13b2_1.fastq        | s13b2_2.fastq       | 20°57'12.006"S | 70°11'10.5996"W | 680m      | 9-Feb-16        | 13:00           |
| s13b3       | s13b3_1.fastq        | s13b3_2.fastq       | 20°57'12.006"S | 70°11'10.5996"W | 680m      | 9-Feb-16        | 13:00           |
| s17a1       | s17a1_1.fastq        | s17a1_2.fastq       | 20°57'12.006"S | 70°11'10.5996"W | 680m      | 8-Feb-16        | 17:00           |
| s17a2       | s17a2_1.fastq        | s17a2_2.fastq       | 20°57'12.006"S | 70°11'10.5996"W | 680m      | 8-Feb-16        | 17:00           |
| s17a3       | s17a3_1.fastq        | s17a3_2.fastq       | 20°57'12.006"S | 70°11'10.5996"W | 680m      | 8-Feb-16        | 17:00           |
| s17b1       | s17b1_1.fastq        | s17b1_2.fastq       | 20°57'12.006"S | 70°11'10.5996"W | 680m      | 9-Feb-16        | 17:00           |
| s17b2       | s17b2_1.fastq        | s17b2_2.fastq       | 20°57'12.006"S | 70°11'10.5996"W | 680m      | 9-Feb-16        | 17:00           |
| s17b3       | s17b3_1.fastq        | s17b3_2.fastq       | 20°57'12.006"S | 70°11'10.5996"W | 680m      | 9-Feb-16        | 17:00           |
| s2017-9am1  | s2017-9am1_1.fastq   | s2017-9am1_2.fastq  | 20°57'12.006"S | 70°11'10.5996"W | 680m      | 20-Feb-17       | 9:00            |
| s2017-9am2  | s2017-9am2_1.fastq   | s2017-9am2_2.fastq  | 20°57'12.006"S | 70°11'10.5996"W | 680m      | 20-Feb-17       | 9:00            |
| s2017-9am3  | s2017-9am3_1.fastq   | s2017-9am3_2.fastq  | 20°57'12.006"S | 70°11'10.5996"W | 680m      | 20-Feb-17       | 9:00            |
| s2017-9am4  | s2017-9am4_1.fastq   | s2017-9am4_2.fastq  | 20°57'12.006"S | 70°11'10.5996"W | 680m      | 20-Feb-17       | 9:00            |
| s2017-9am5  | s2017-9am5_1.fastq   | s2017-9am5_2.fastq  | 20°57'12.006"S | 70°11'10.5996"W | 680m      | 20-Feb-17       | 9:00            |
| s2017-9am6  | s2017-9am6_1.fastq   | s2017-9am6_2.fastq  | 20°57'12.006"S | 70°11'10.5996"W | 680m      | 20-Feb-17       | 9:00            |
| s2017-9am7  | s2017-9am7_1.fastq   | s2017-9am7_2.fastq  | 20°57'12.006"S | 70°11'10.5996"W | 680m      | 21-Feb-17       | 9:00            |
| s2017-9am8  | s2017-9am8_1.fastq   | s2017-9am8_2.fastq  | 20°57'12.006"S | 70°11'10.5996"W | 680m      | 21-Feb-17       | 9:00            |
| s2017-9am9  | s2017-9am9_1.fastq   | s2017-9am9_2.fastq  | 20°57'12.006"S | 70°11'10.5996"W | 680m      | 21-Feb-17       | 9:00            |
| s2017-9am10 | s2017-9am10_1.fastq  | s2017-9am10_2.fastq | 20°57'12.006"S | 70°11'10.5996"W | 680m      | 21-Feb-17       | 9:00            |
| s2017-9am11 | s2017-9am11_1.fastq  | s2017-9am11_2.fastq | 20°57'12.006"S | 70°11'10.5996"W | 680m      | 21-Feb-17       | 9:00            |
| s2017-9am12 | s2017-9am12_1.fastq  | s2017-9am12_2.fastq | 20°57'12.006"S | 70°11'10.5996"W | 680m      | 21-Feb-17       | 9:00            |
| s2017-9pm1  | s2017-9pm1_1.fastq   | s2017-9pm1_2.fastq  | 20°57'12.006"S | 70°11'10.5996"W | 680m      | 20-Feb-17       | 21:00           |
| s2017-9pm2  | s2017-9pm2_1.fastq   | s2017-9pm2_2.fastq  | 20°57'12.006"S | 70°11'10.5996"W | 680m      | 20-Feb-17       | 21:00           |
| s2017-9pm3  | s2017-9pm3_1.fastq   | s2017-9pm3_2.fastq  | 20°57'12.006"S | 70°11'10.5996"W | 680m      | 20-Feb-17       | 21:00           |
| s2017-9pm4  | s2017-9pm4_1.fastq   | s2017-9pm4_2.fastq  | 20°57'12.006"S | 70°11'10.5996"W | 680m      | 20-Feb-17       | 21:00           |
| s2017-9pm5  | s2017-9pm5_1.fastq   | s2017-9pm5_2.fastq  | 20°57'12.006"S | 70°11'10.5996"W | 680m      | 20-Feb-17       | 21:00           |
| s2017-9pm6  | s2017-9pm6_1.fastq   | s2017-9pm6_2.fastq  | 20°57'12.006"S | 70°11'10.5996"W | 680m      | 20-Feb-17       | 21:00           |
| s2017-9pm7  | s2017-9pm7_1.fastq   | s2017-9pm7_2.fastq  | 20°57'12.006"S | 70°11'10.5996"W | 680m      | 21-Feb-17       | 21:00           |
| s2017-9pm8  | s2017-9pm8_1.fastq   | s2017-9pm8_2.fastq  | 20°57'12.006"S | 70°11'10.5996"W | 680m      | 21-Feb-17       | 21:00           |
| s2017-9pm9  | s2017-9pm9_1.fastq   | s2017-9pm9_2.fastq  | 20°57'12.006"S | 70°11'10.5996"W | 680m      | 21-Feb-17       | 21:00           |
| s2017-9pm10 | s2017-9pm10_1.fastq  | s2017-9pm10_2.fastq | 20°57'12.006"S | 70°11'10.5996"W | 680m      | 21-Feb-17       | 21:00           |
| s2017-9pm11 | s2017-9pm11_1.fastq  | s2017-9pm11_2.fastq | 20°57'12.006"S | 70°11'10.5996"W | 680m      | 21-Feb-17       | 21:00           |
| s2017-9pm12 | s2017-9pm12_1.fastq  | s2017-9pm12_2.fastq | 20°57'12.006"S | 70°11'10.5996"W | 680m      | 21-Feb-17       | 21:00           |
