# Supplementary material for: Regulatory Noncoding Small RNAs Are Diverse and Abundant in an Extremophilic Microbial Community
Source: PubMed Central journal article supplement (PMC7002113; doi:10.1128/msystems.00584-19), 2020-02-04
Supplement: mSystems.00584-19-st002.pdf [file mSystems.00584-19-st002.pdf]

**Table S2: Experimentally validated itsRNAs**

| RT-PCR amplicon with |                      |            |                 |                              |                                                                                                                                                                                                                                                                                         |
|----------------------|----------------------|------------|-----------------|------------------------------|-----------------------------------------------------------------------------------------------------------------------------------------------------------------------------------------------------------------------------------------------------------------------------------------|
| sRNA_ID              | Taxonomy             | Primer set | Environ. sample | Enrichment cultures          | Sequence                                                                                                                                                                                                                                                                                |
| STRG.134829.3        | <i>Halotheca</i>     |            | 17A2, 9B2       | IO-YPC;<br>GN101; Hv-<br>YPC | > STRG.134829.3<br>AACCTTACGGTTTGTCCAAAT<br>TAACCTCTGTACCGGTAGTCC<br>ATCGGAAATTGACGAGCAAC<br>CCTGAATTGACAGGGTGTCC<br>AATTAAACTGGATGGAGATA<br>CGATGACTAGCCGTTAGGTG<br>GTCAGCCTGCTAACCTCGAT<br>TTGAGTGGCGGAGAACCTGA<br>GTGATTAGGTTCTAGAATCTC<br>CCACCATAATCTTTGATTTGG<br>TGGTGAGAGT       |
| STRG.66426.1         | <i>Salinarchaeum</i> |            | 17B2            | IO-YPC;<br>GN101; Hv-<br>YPC | > STRG.66426.1<br>GGTCGACTAGGCTGGGCGG<br>TTAGGCCCGCTCCGACGCC<br>CGCAGTACGGTCTTCAGCGG<br>GGGCCGAACCCGGGGACGTC<br>CGGTACAGCCGGGACGGGCC<br>TCGGAAGCCAACGTCAAGC<br>CTCGTCCCTCGGGACGACG<br>GTCCACGGCGGTGCCTGCA<br>GGGGCGGTTGTCGTGGTTC<br>GTCGGCGGACCCGGGTCAGG<br>CGCGAAGCGAGCAGCCAC<br>CGTCG |
| STRG.104813.1        | <i>Halomicrobium</i> |            | none            | Hv-YPC;<br>GN101             | > STRG.104813.1<br>GGACTCCAGTTTCAGGCCGT<br>GAAACCGCGTTAGTGCGAT<br>GTAGCGCCGAAAACAATCAC<br>AACAATCACTAT                                                                                                                                                                                  |
